# Supplementary material
Source: PubMed Central journal article supplement (PMC6582638)
Supplement: NIHMS1530359-supplement-1.pdf [file NIHMS1530359-supplement-1.pdf]

# Supplementary data

## S1. Figures

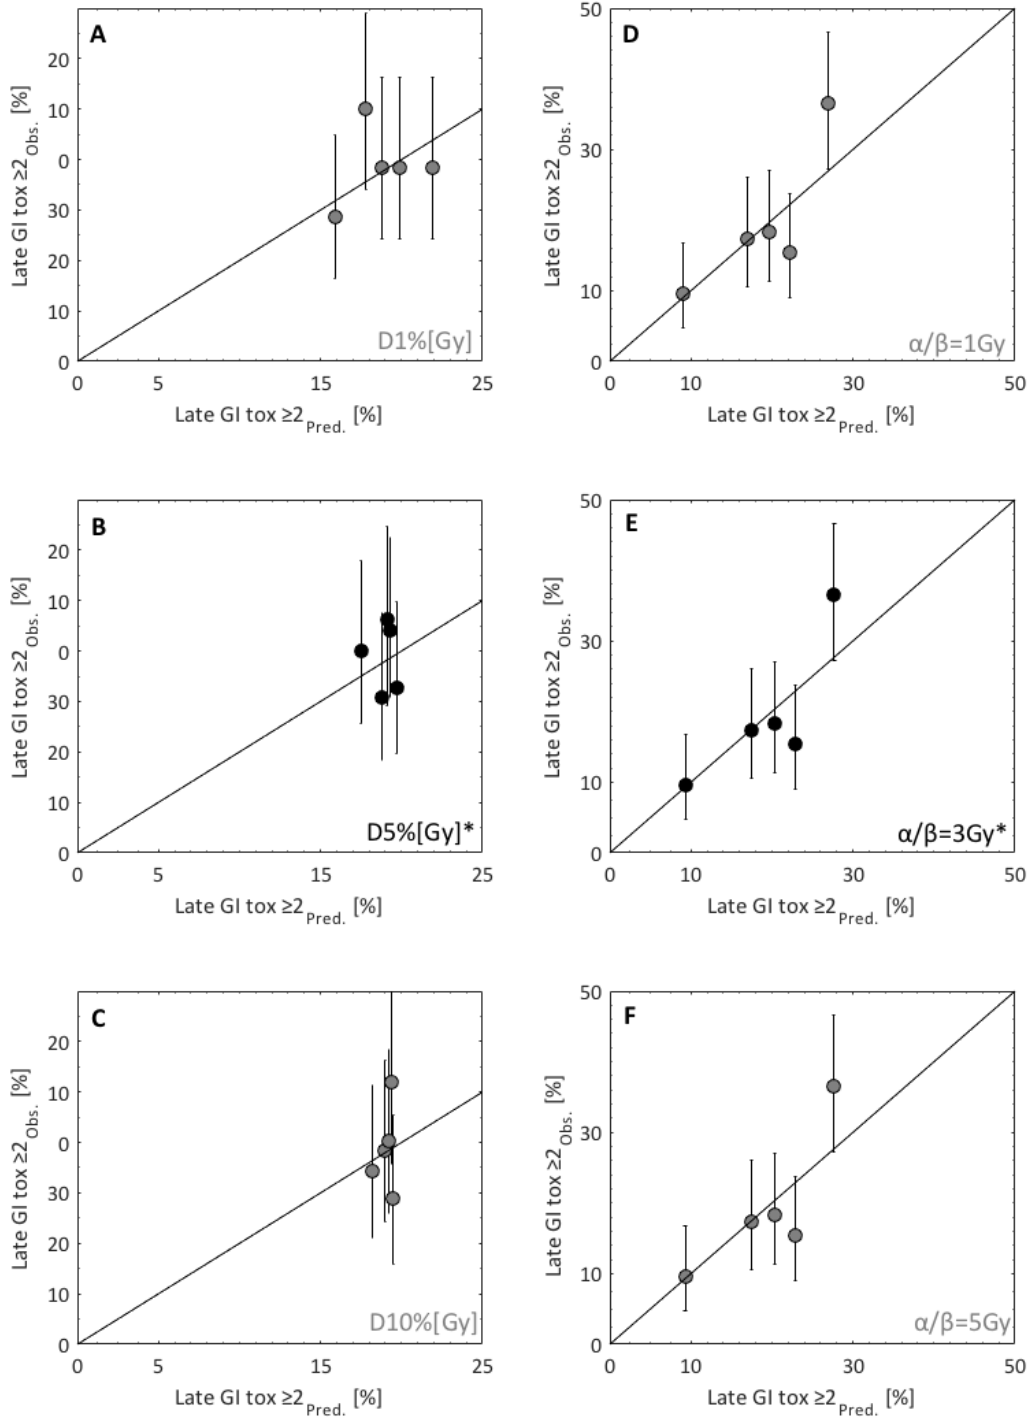

Figure S1. Calibration plots in quintiles for model IV re-fitted in the complete data with A-C. Altered  $Dx\%[Gy]$  (A:  $D1\%[Gy]$ ; B\*: The used  $D5\%[Gy]$ ; C:  $D10\%[Gy]$ ), and D-F. Altered  $\alpha/\beta$  ratio values (D:  $\alpha/\beta=1Gy$ ; E\*: The used  $\alpha/\beta=3Gy$ ; F:  $\alpha/\beta=5Gy$ ). Note: Solid lines: Identity lines; Error bars: exact 95% binomial CIs.

## **S2. Tables**

*Table S1.* The symptom rate for the late moderate to severe ( $\geq$ Grade 2) GI and GU toxicities. \*: Analyzed symptoms.

| <b>Symptom</b>       | <b>Rate (N) [%]</b> |
|----------------------|---------------------|
| <b>GI</b>            |                     |
| Colitis              | 1 (4)               |
| Constipation         | 2 (8)               |
| Diarrhea             | 1 (4)               |
| Fecal incontinence   | 1 (3)               |
| GI toxicity          | 19 (101)*           |
| Hemorrhoids          | 1 (5)               |
| Proctitis            | 14 (73)*            |
| <b>GU</b>            |                     |
| Bladder obstruction  | 1 (4)               |
| Bladder spasm        | <1 (2)              |
| Cystitis             | 6 (29)              |
| GU toxicity          | 28 (145)*           |
| Pollakiuria          | 18 (92)*            |
| Renal GU Other       | 5 (24)              |
| Urethral obstruction | 1 (4)               |
| Urethral stricture   | 2 (12)              |
| Urinary incontinence | 4 (21)              |
| Urinary retention    | 4 (23)              |
| Urinary stenosis     | <1 (1)              |

Table S2. Summary of the % of patients fulfilling each of the four rectal dose-planning constraints. *Note:* All dose levels are given as (3)[EQD2Gy].

Proportion fulfilling rectal constraints    **V59Gy[%]≤50**    **V64Gy[%]≤35**    **V69Gy[%]≤25**    **V74Gy[%]≤15**

|                      | <b>V59Gy[%]≤50</b> | <b>V64Gy[%]≤35</b> | <b>V69Gy[%]≤25</b> | <b>V74Gy[%]≤15</b> |
|----------------------|--------------------|--------------------|--------------------|--------------------|
| <b>All patients</b>  |                    |                    |                    |                    |
| Late GI≥2 (N=101)    | 0.99               | 0.97               | 0.92               | 0.77               |
| No late GI≥2 (N=420) | 0.99               | 0.97               | 0.96               | 0.86               |
| <b>3DCRT</b>         |                    |                    |                    |                    |
| Late GI≥2 (N=19)     | 1.00               | 1.00               | 0.84               | 0.74               |
| No late GI≥2 (N=89)  | 0.99               | 0.98               | 0.96               | 0.81               |
| <b>IMRT</b>          |                    |                    |                    |                    |
| Late GI≥2 (N=82)     | 0.99               | 0.96               | 0.94               | 0.78               |
| No late GI≥2 (N=331) | 0.99               | 0.97               | 0.96               | 0.88               |
